# Supplementary material for: Chronic in vivo imaging defines age-dependent alterations of neurogenesis in the mouse hippocampus
Source: PubMed Central journal article supplement (PMC10154232; doi:10.1038/s43587-023-00370-9), 2023-02-20
Supplement: 43587_2023_370_MOESM1_ESM.pdf [file 43587_2023_370_MOESM1_ESM.pdf]

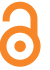

---

# Chronic in vivo imaging defines age-dependent alterations of neurogenesis in the mouse hippocampus

---

In the format provided by the authors and unedited

---

1. bf2981.SPOT1.clone1

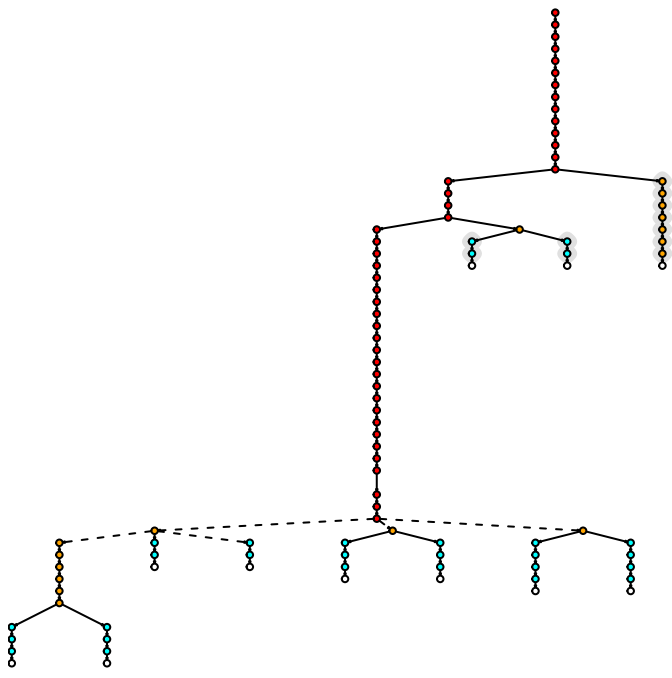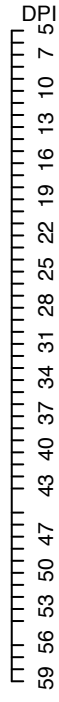

2. bf2981.SPOT1.clone2

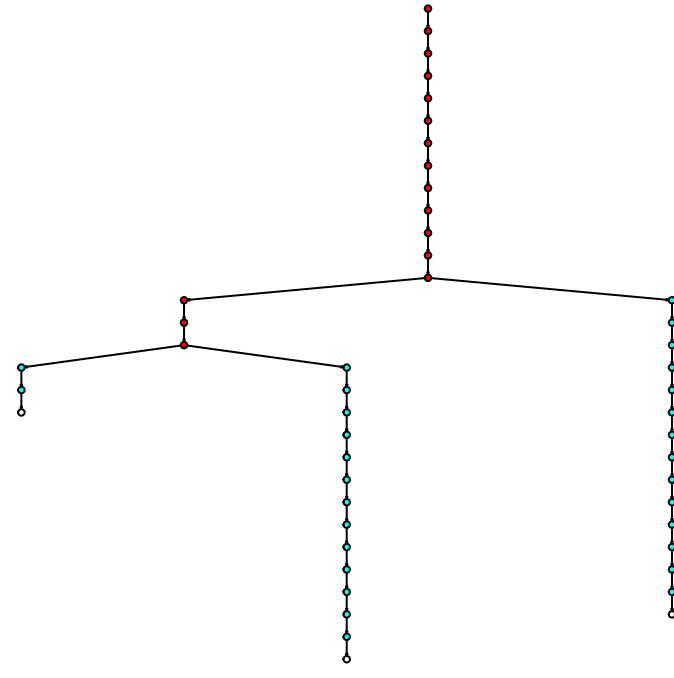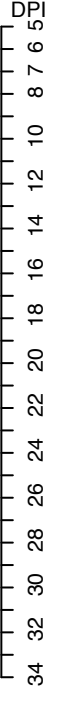

3. bf2981.SPOT1.clone3

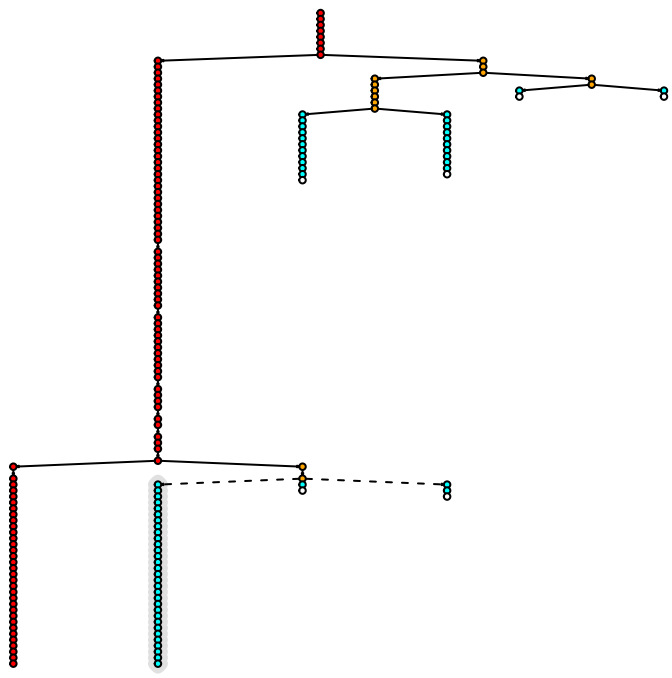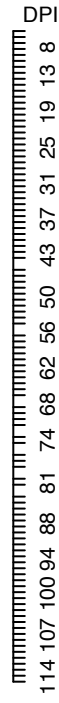

4. bf2981.SPOT10.clone1

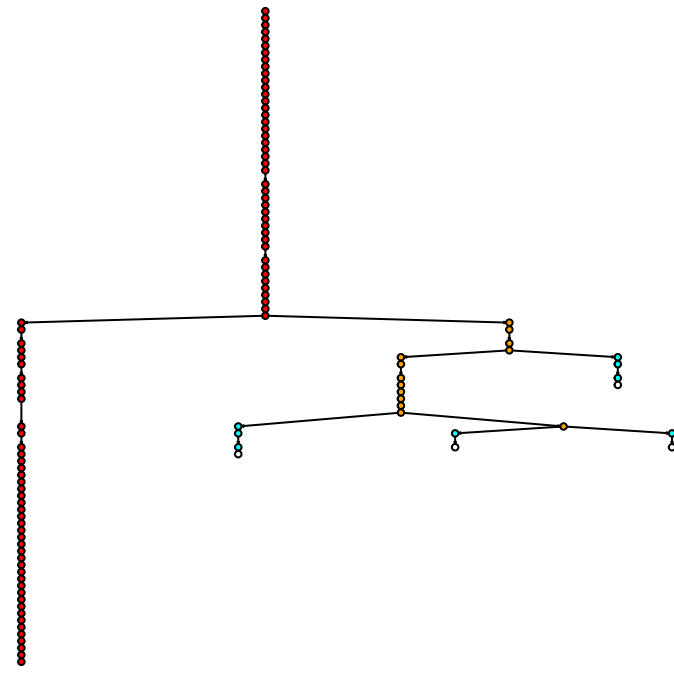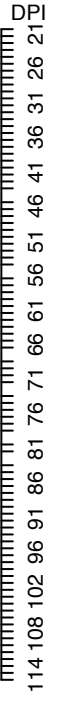

5. bf2981.SPOT11.clone1

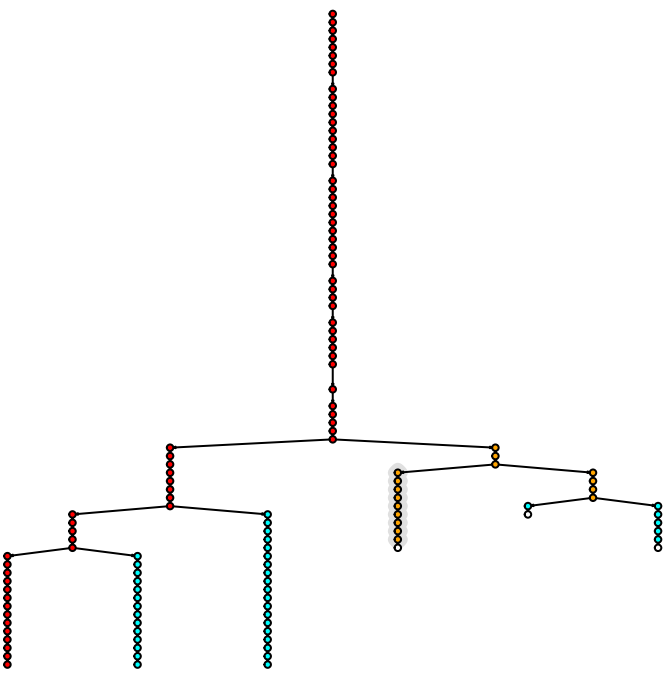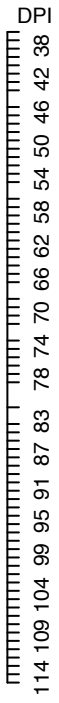

6. bf2981.SPOT11.clone2

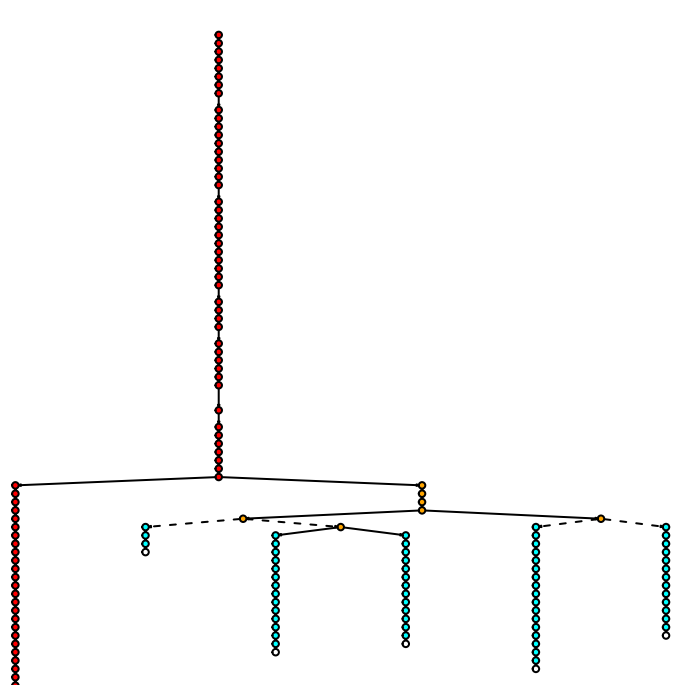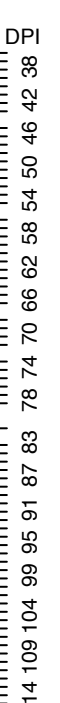

|              |                       |                     |
|--------------|-----------------------|---------------------|
| cell types   | uncertainty cell type | uncertainty lineage |
| ● R          | ○ semi-certain        | — certain           |
| ● NR         | ● uncertain           | - - - semi-certain  |
| ● N          |                       | ⋯ uncertain         |
| ○ Cell_Death |                       |                     |

7. bf2981.SPOT3.clone1

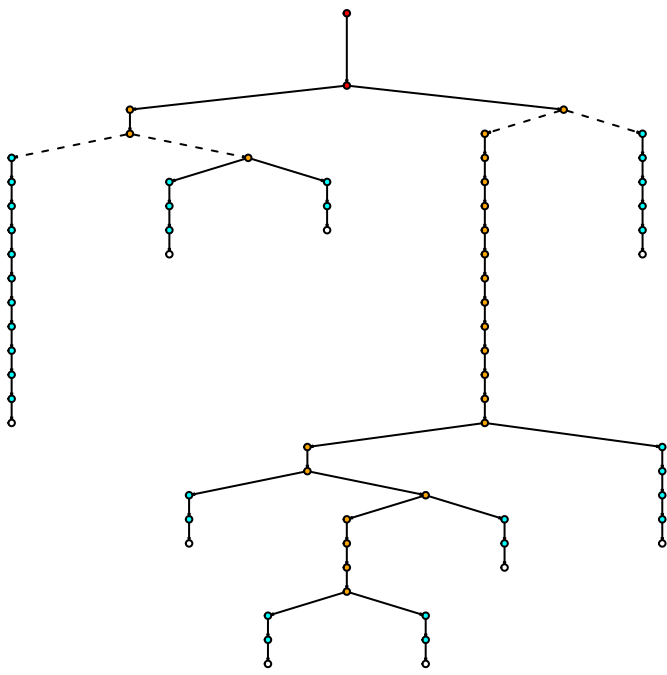

8. bf2981.SPOT3.clone2

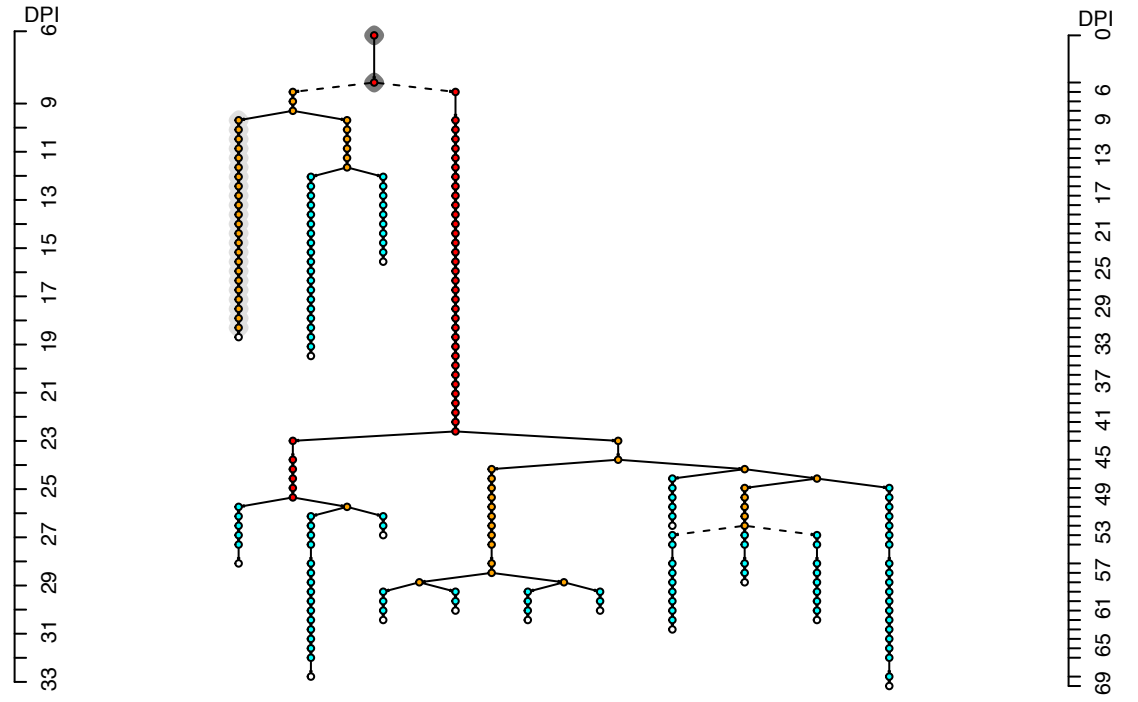

9. bf2981.SPOT5.clone1

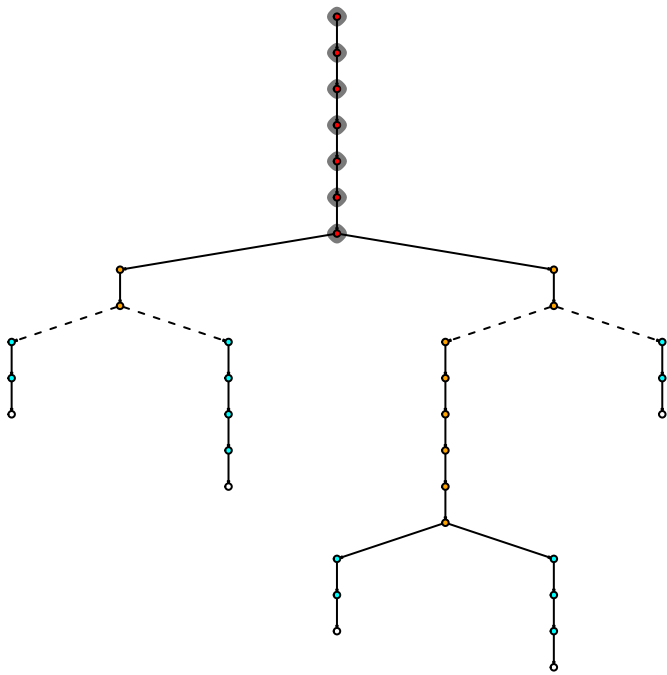

10. bf2981.SPOT5.clone2

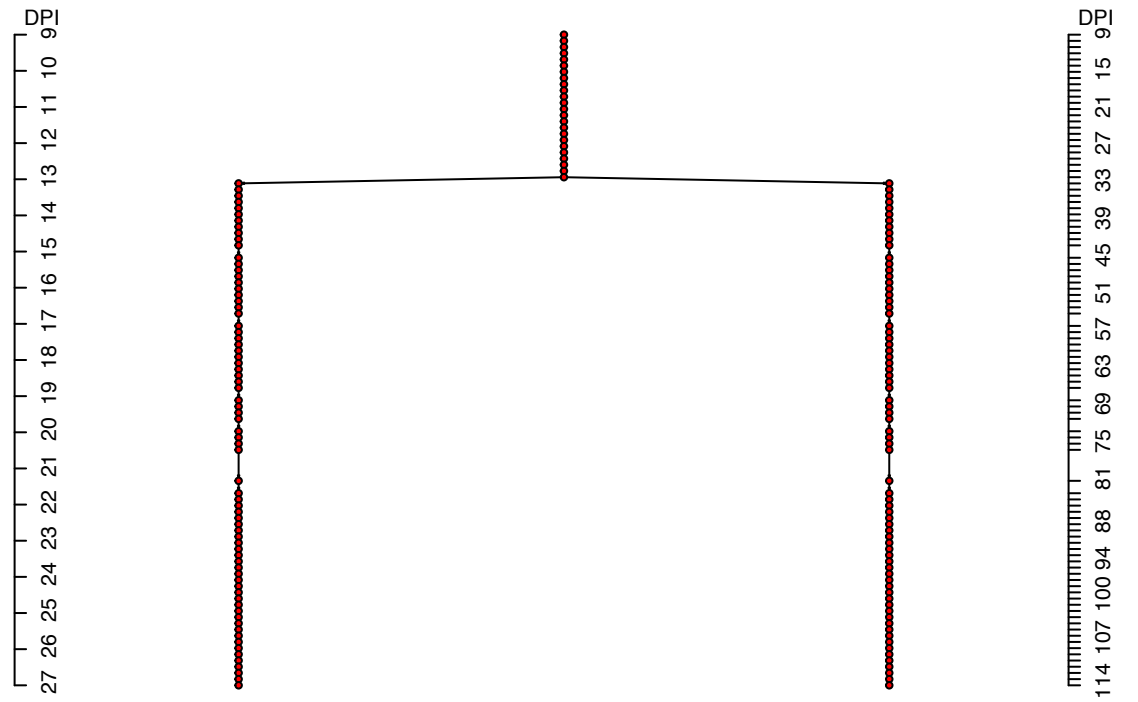

11. bf2981.SPOT5.clone3

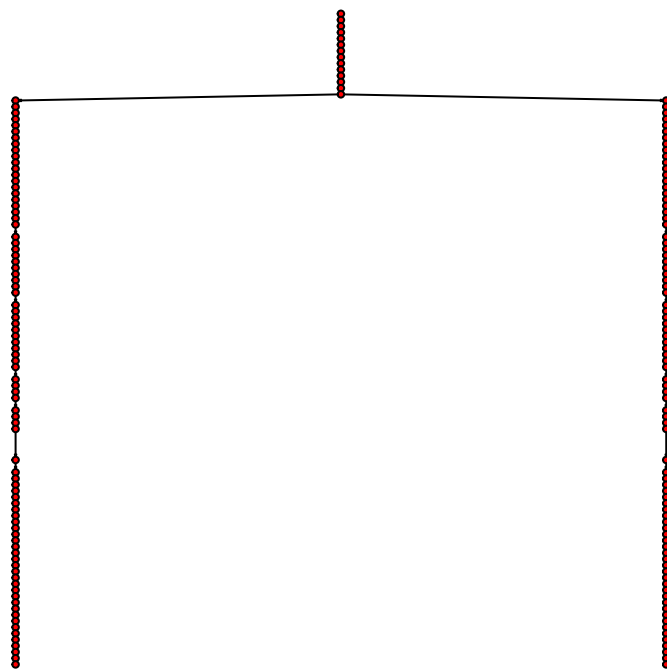

12. bf2981.SPOT6.clone1

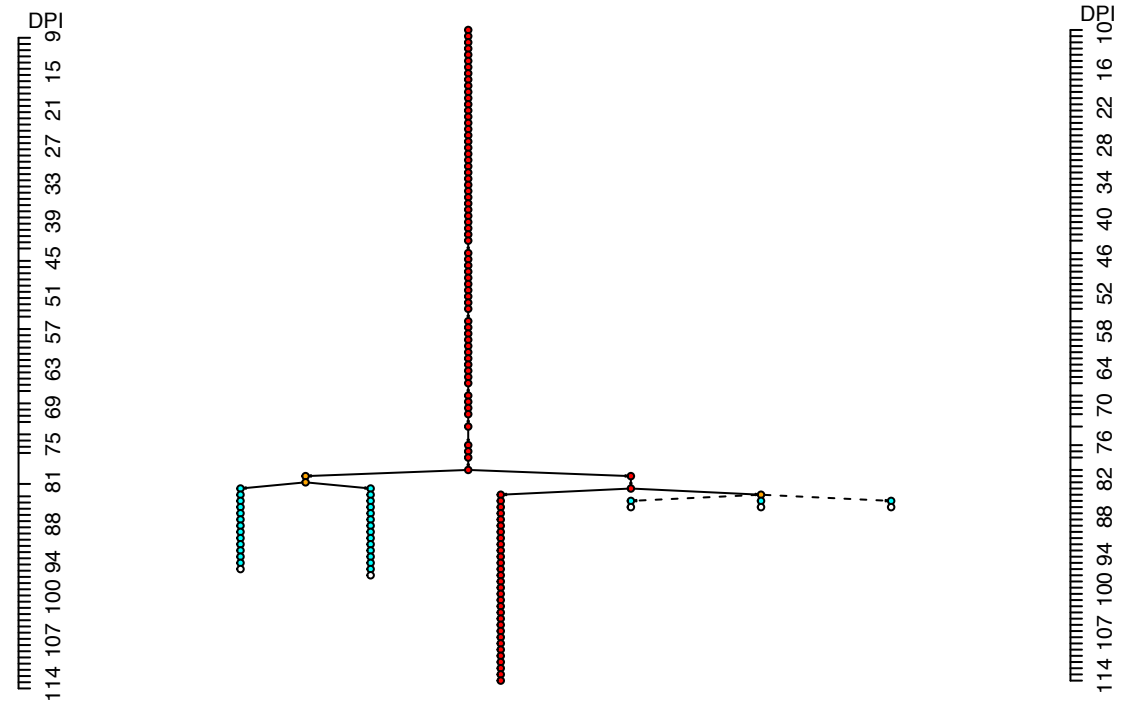

cell types    uncertainty cell type    uncertainty lineage

- R
- NR
- N
- Cell\_Death
- semi-certain
- uncertain
- certain
- - - semi-certain
- ... uncertain

13. bf2981.SPOT6.clone2

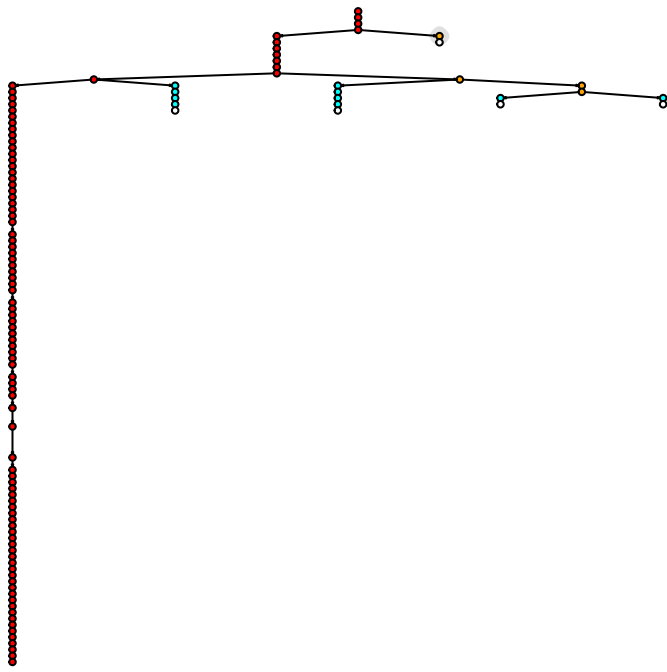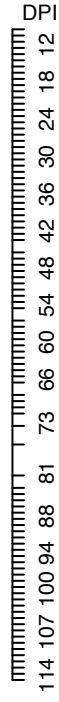

14. bf2981.SPOT6.clone3

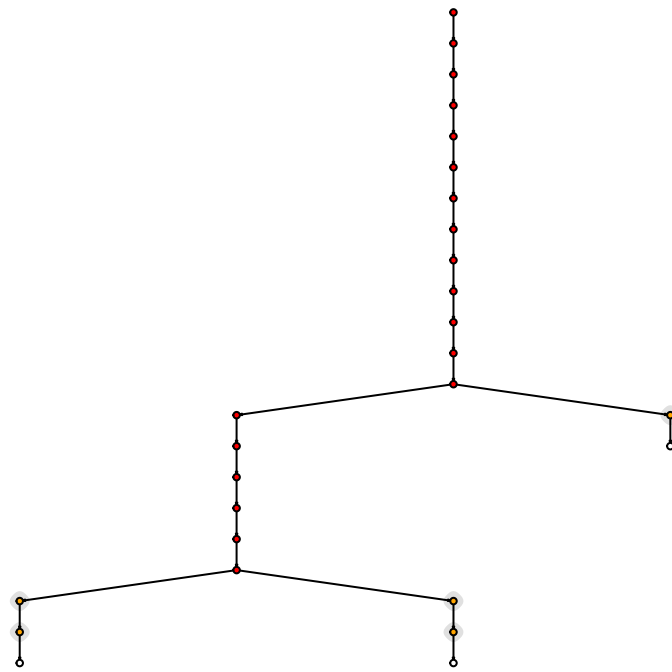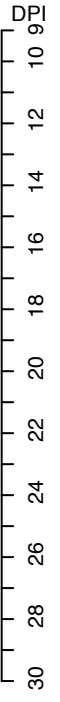

15. bf2983.SPOT1.clone1

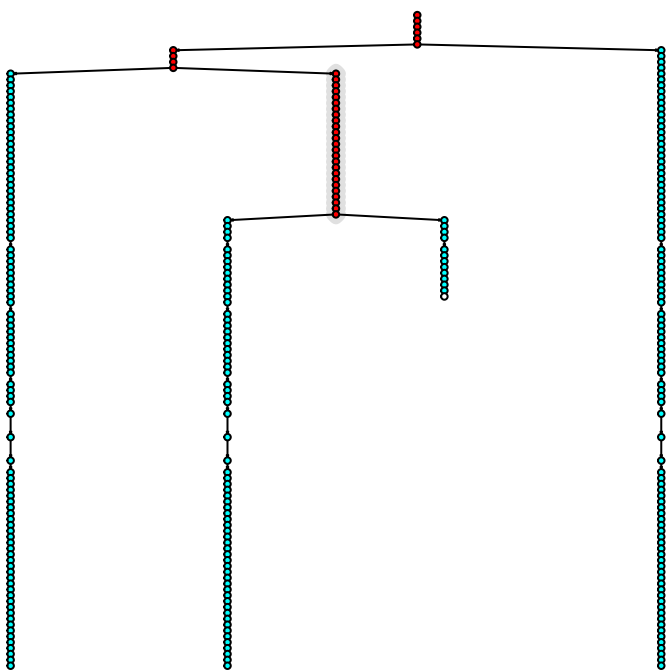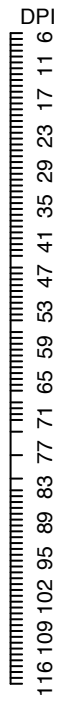

16. bf2983.SPOT1.clone2

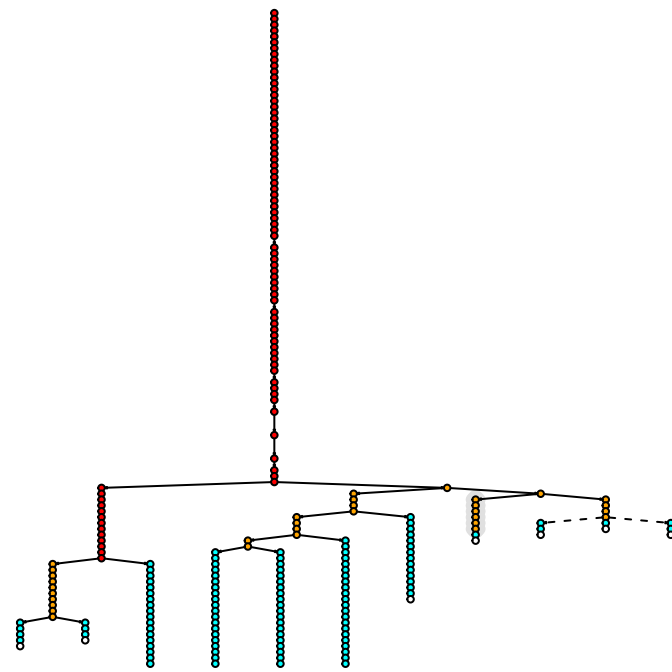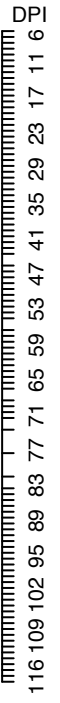

17. bf2983.SPOT1.clone3

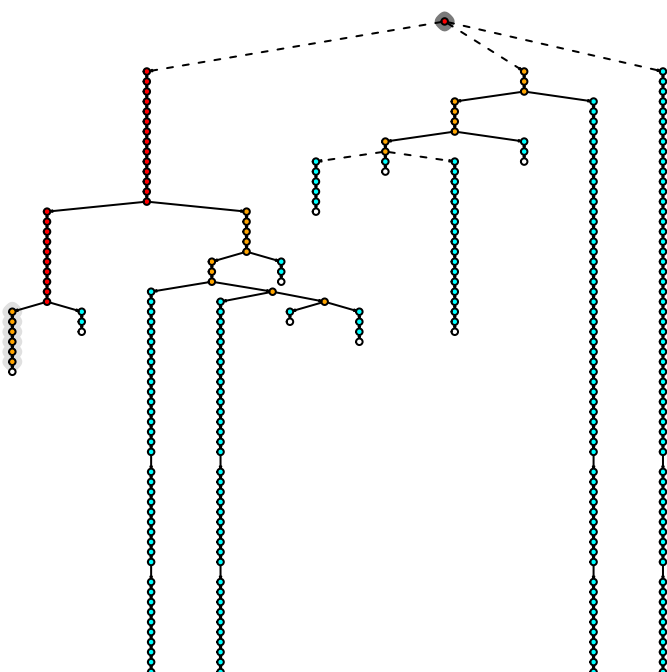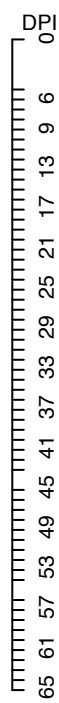

18. bf2983.SPOT10.clone1

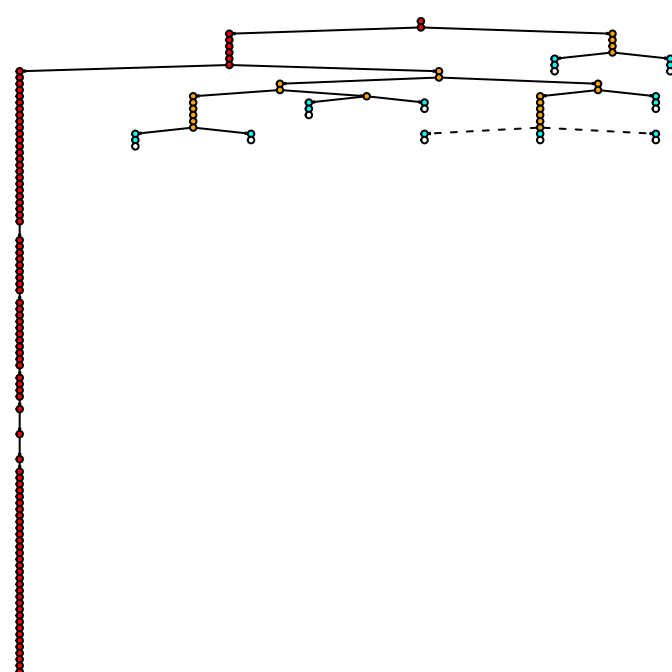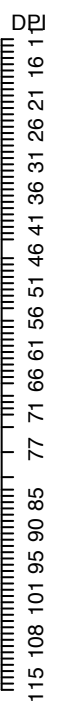

cell types    uncertainty cell type    uncertainty lineage

- R
- NR
- N
- Cell\_Death
- semi-certain
- uncertain
- certain
- - - semi-certain
- · · uncertain

19. bf2983.SPOT10.clone2

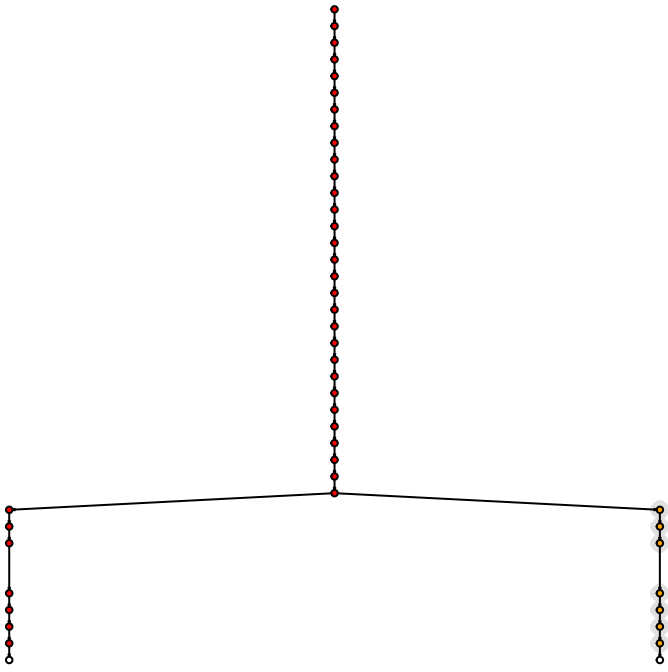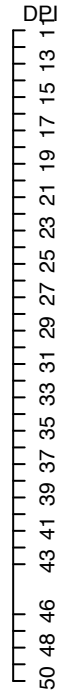

20. bf2983.SPOT2.clone1

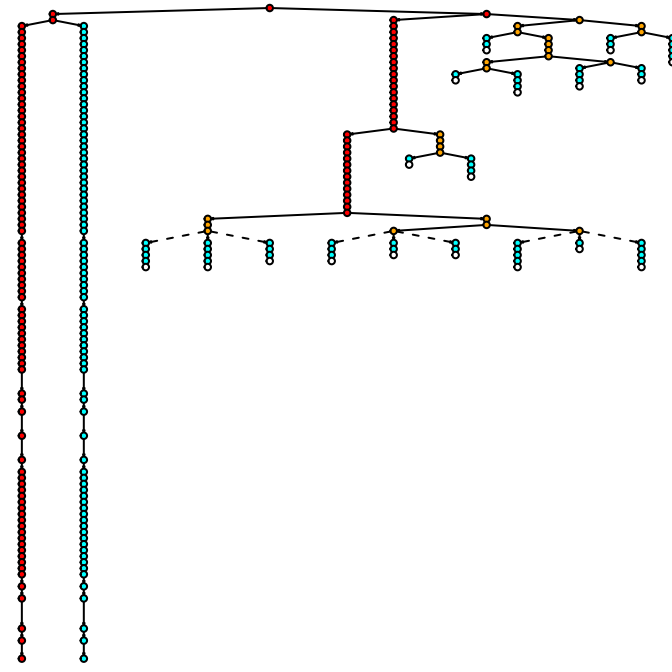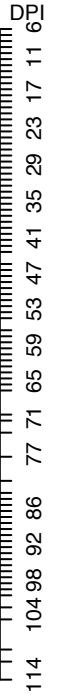

21. bf2983.SPOT2.clone2

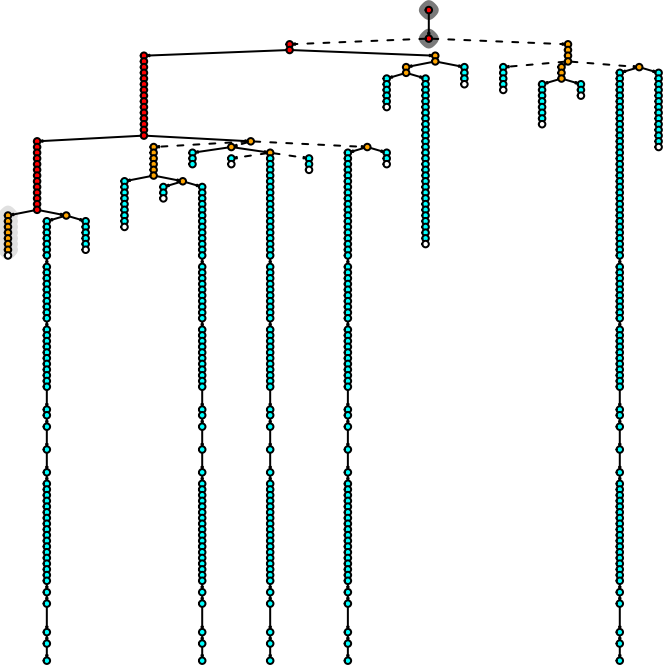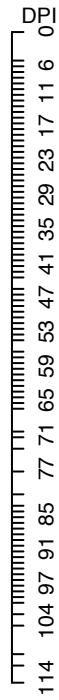

22. bf2983.SPOT3.clone1

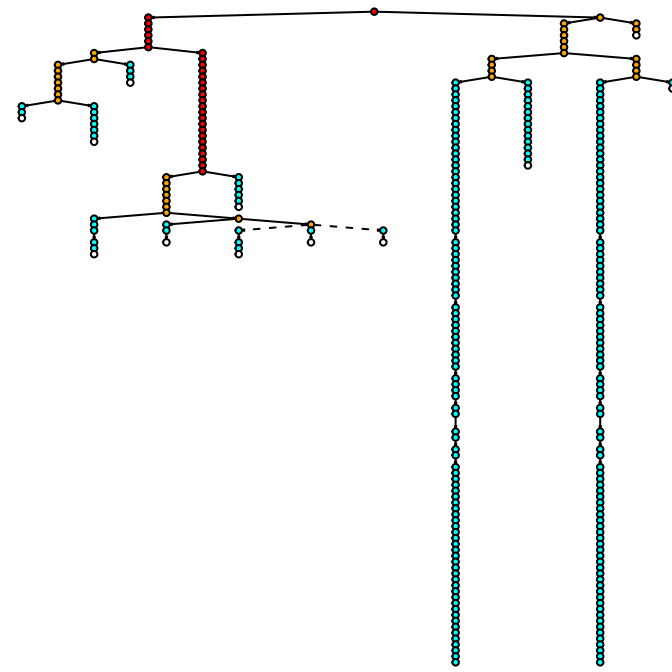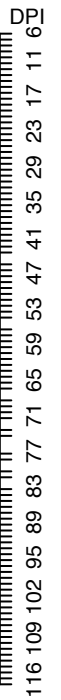

23. bf2983.SPOT5.clone1

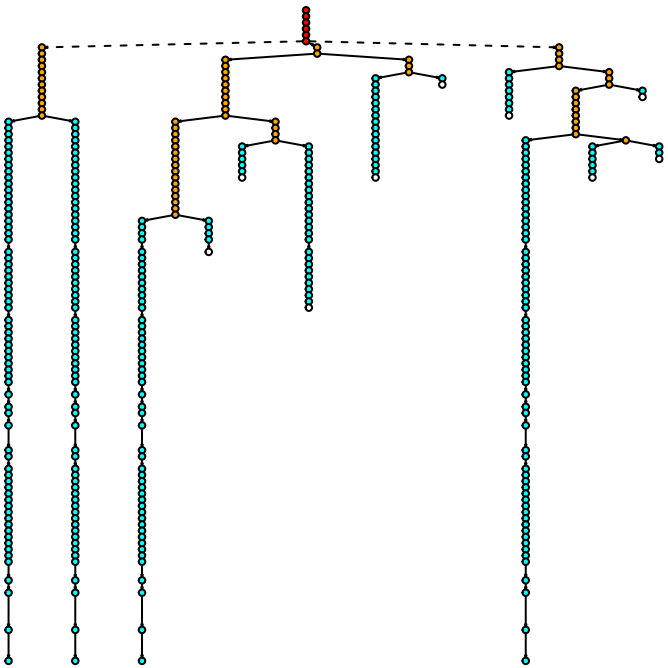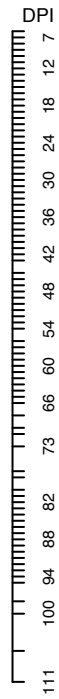

24. bf2983.SPOT5.clone2

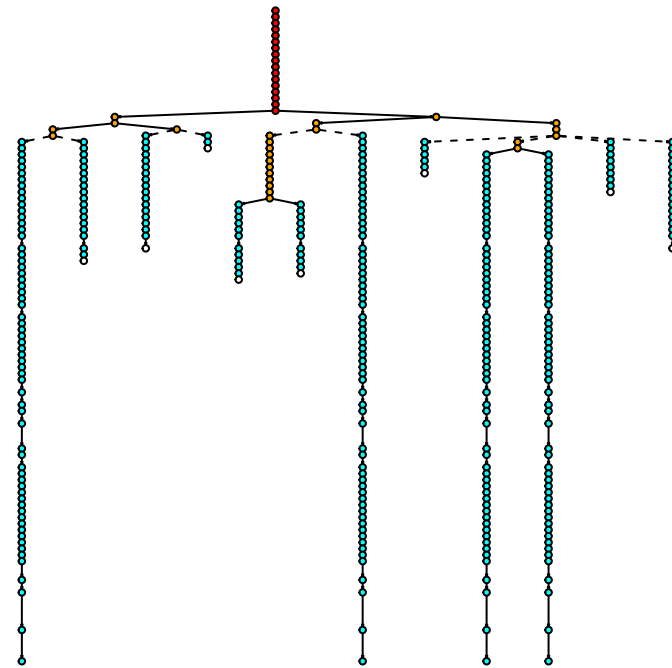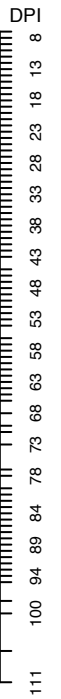

cell types    uncertainty cell type    uncertainty lineage

- R
- NR
- N
- Cell\_Death
- semi-certain
- uncertain
- certain
- - - semi-certain
- · · uncertain

25. bf2983.SPOT7.clone1

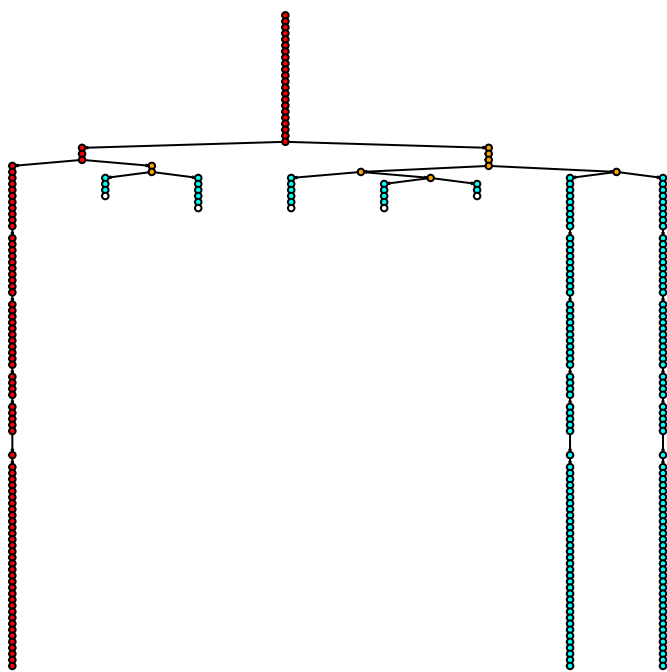

DPI  
116 109 102 96 90 84 77 71 65 59 53 47 41 35 29 23 17 11

26. bf2983.SPOT7.clone2

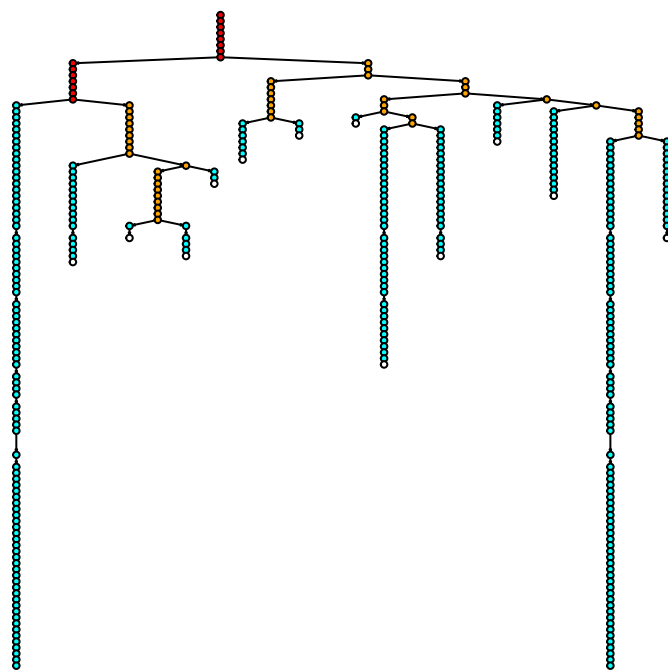

DPI  
116 109 102 96 90 84 77 71 65 59 53 47 41 35 29 23 17 11

27. bf2983.SPOT7.clone3

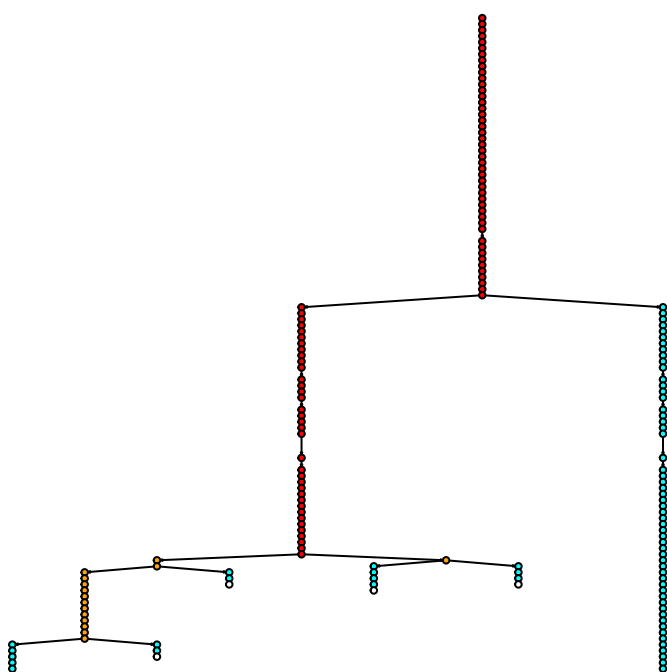

DPI  
116 109 102 96 90 84 77 71 65 59 53 47 41 35 29 23 17 11

28. bf2983.SPOT7.clone5

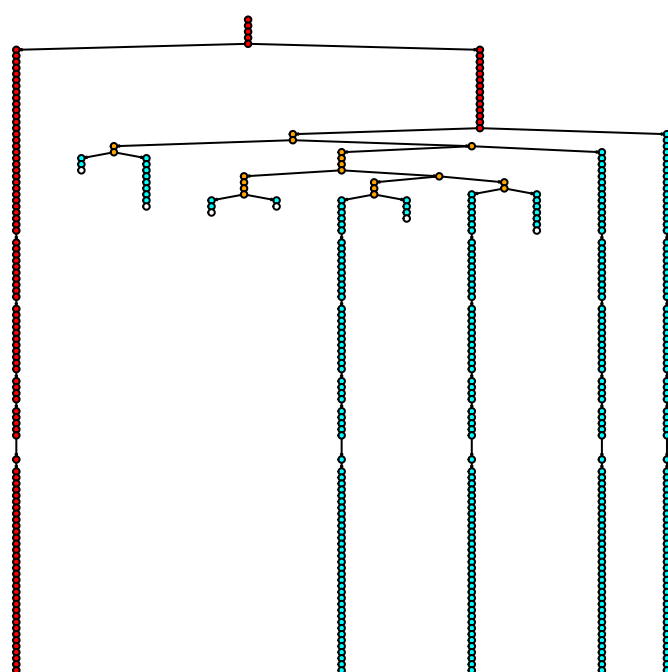

DPI  
116 109 102 96 90 84 77 71 65 59 53 47 41 35 29 23 17 11

29. bf2983.SPOT7.clone6

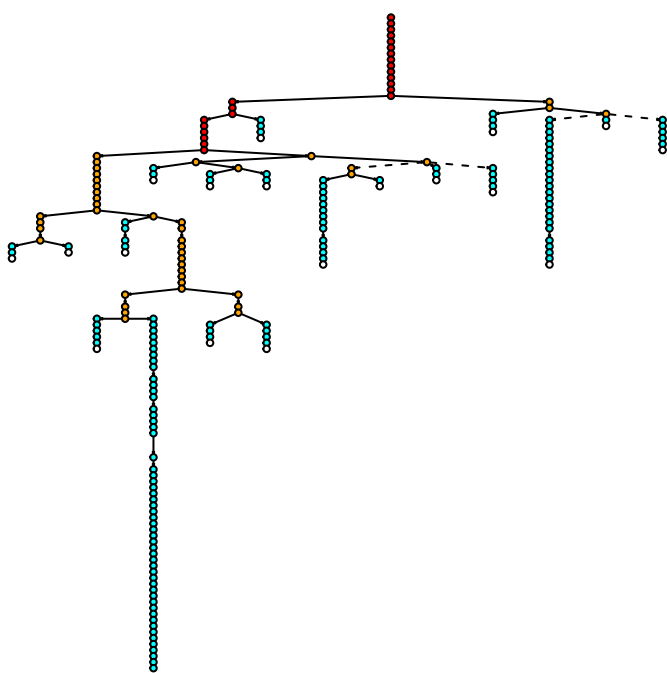

DPI  
116 109 102 96 90 84 77 71 65 59 53 47 41 35 29 23 17 11

30. bf2985.SPOT14.clone1

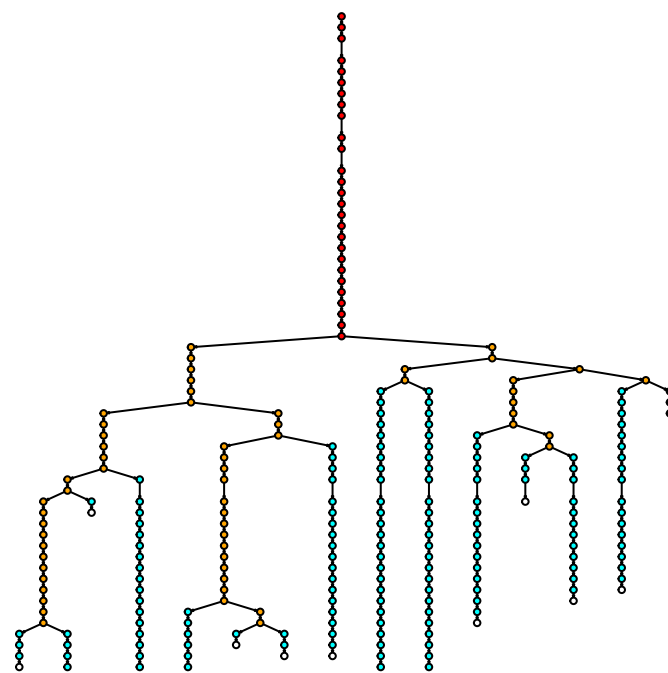

DPI  
89 86 83 80 77 74 71 68 65 62 59 56 53 50 47 44 41 38 35 32

|              |                       |                     |
|--------------|-----------------------|---------------------|
| cell types   | uncertainty cell type | uncertainty lineage |
| ● R          | ○ semi-certain        | — certain           |
| ● NR         | ● uncertain           | - - - semi-certain  |
| ● N          |                       | ... uncertain       |
| ○ Cell_Death |                       |                     |

31. bf2985.SPOT2.clone1

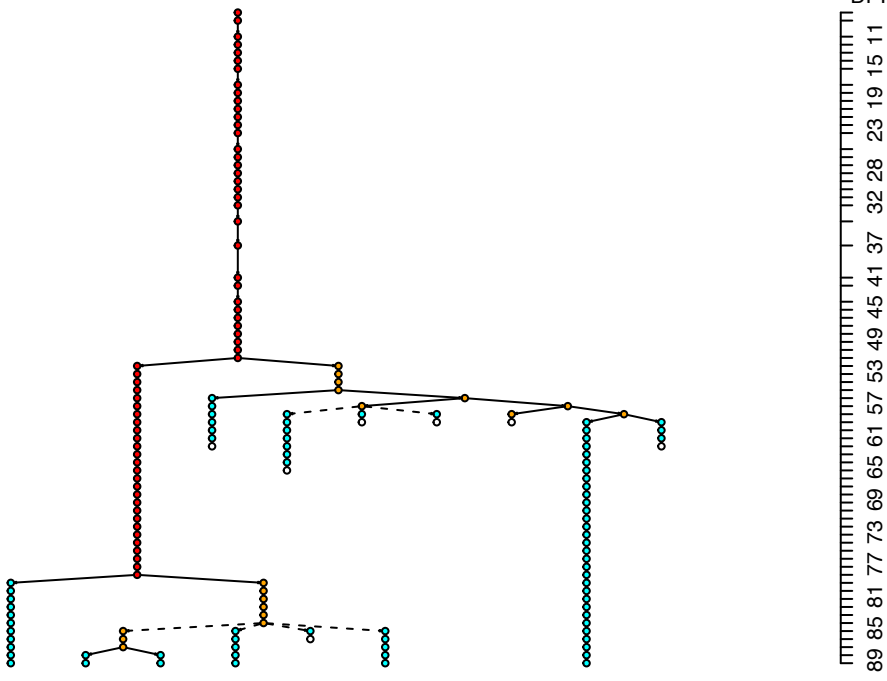

32. bf2985.SPOT4.clone1

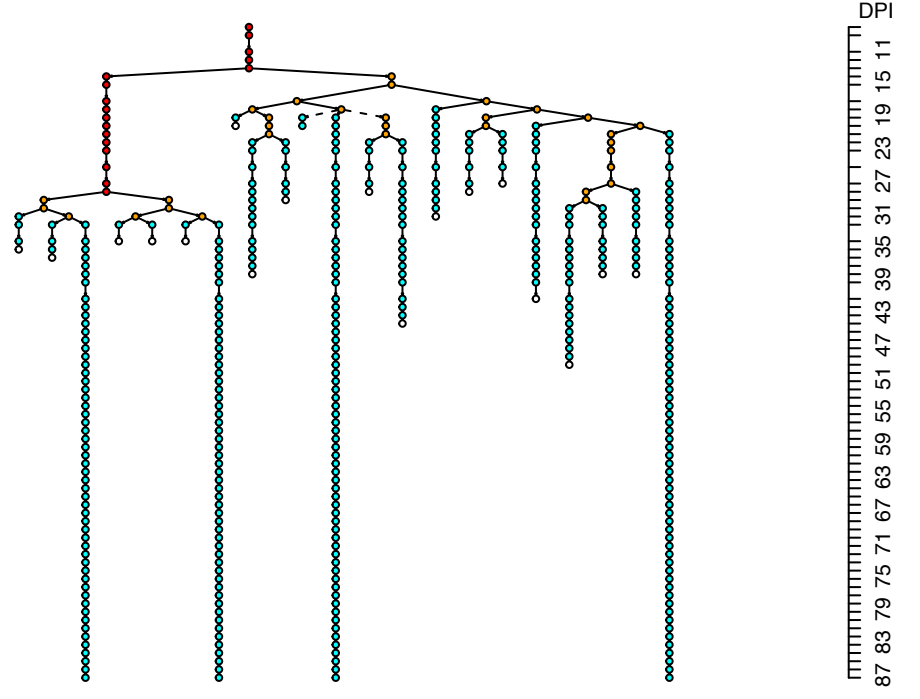

33. bf2985.SPOT4.clone2

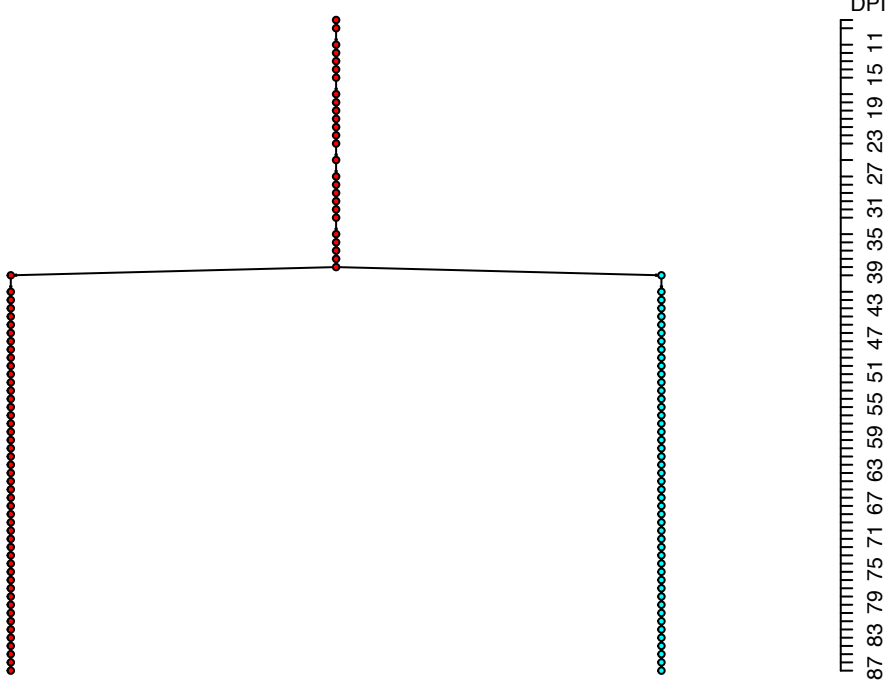

34. bf2985.SPOT4.clone3

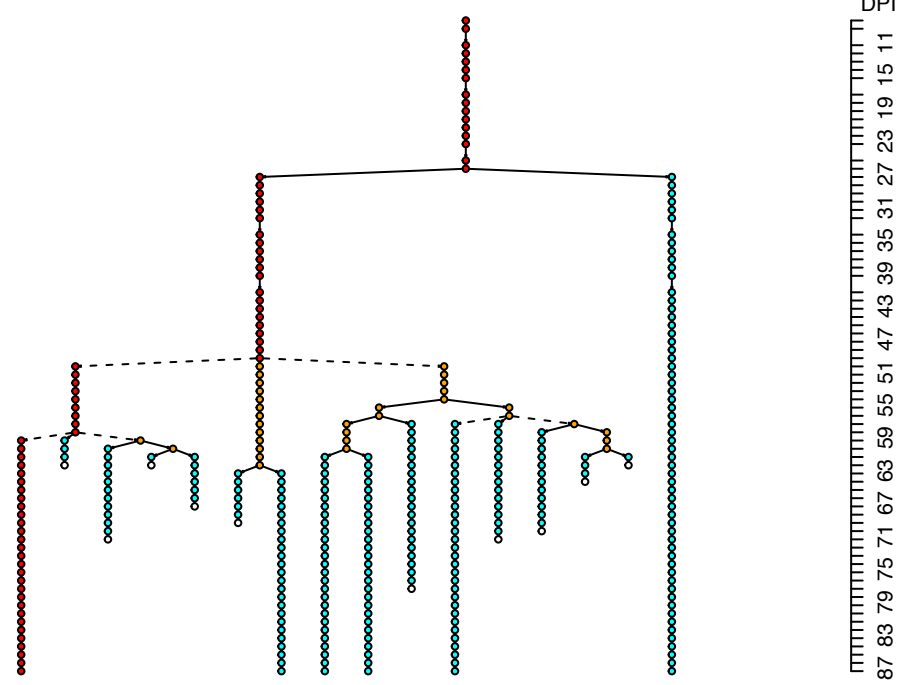

35. bf2985.SPOT4.clone5

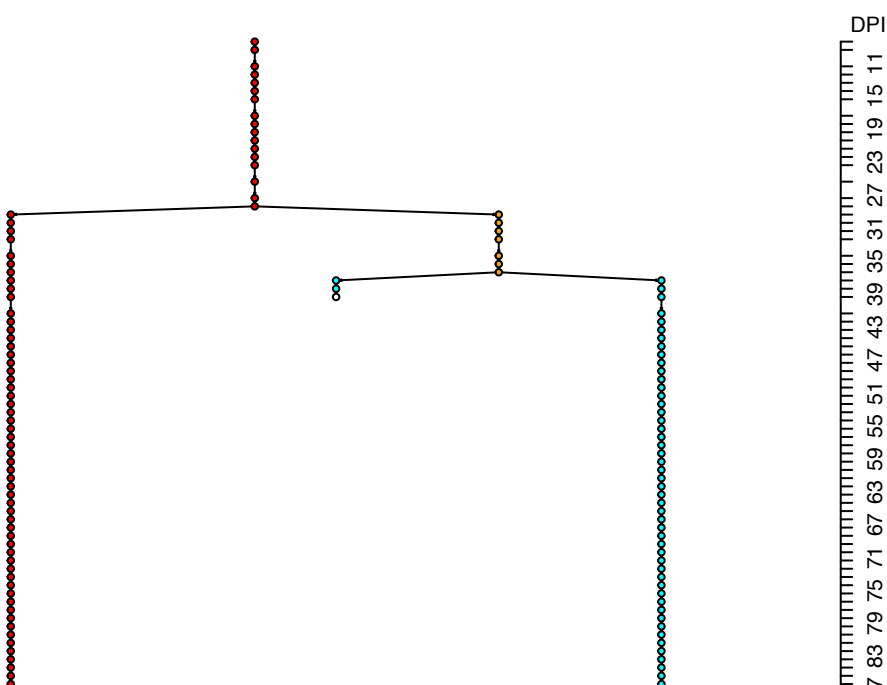

36. bf2985.SPOT4.clone7

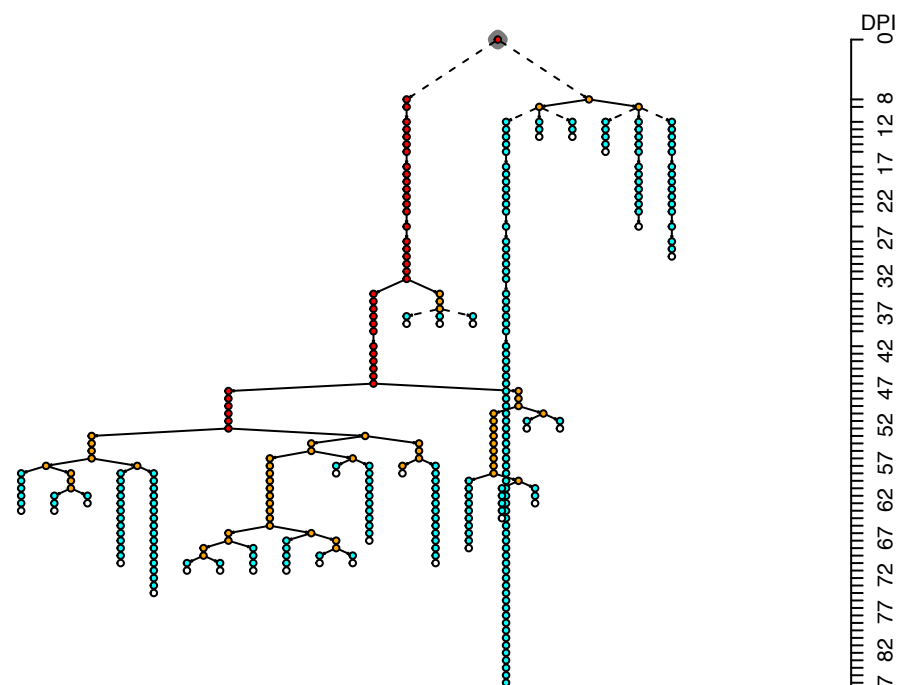

cell types    uncertainty cell type    uncertainty lineage  
 ● R            ○ semi-certain            — certain  
 ● NR           ● uncertain            - - - semi-certain  
 ● N            ○ Cell\_Death            ···· uncertain

37. bf3419.SPOT12.clone1

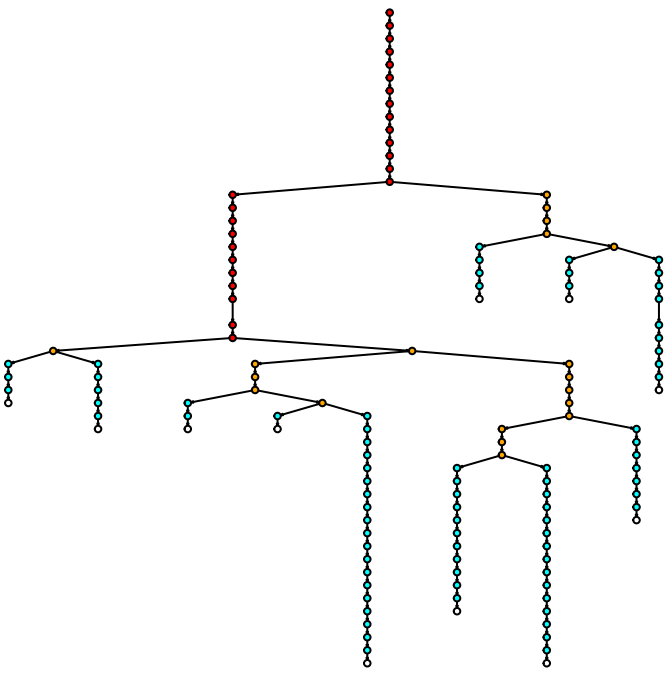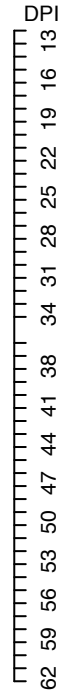

38. bf3419.SPOT12.clone2

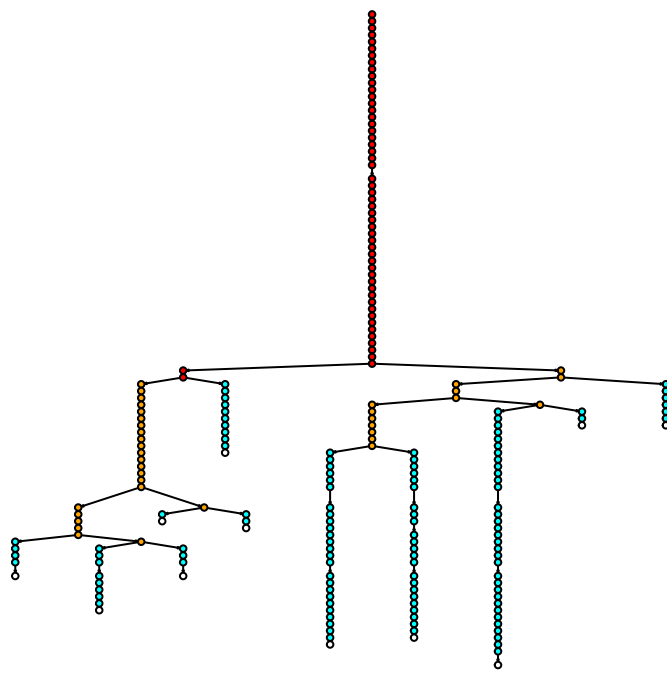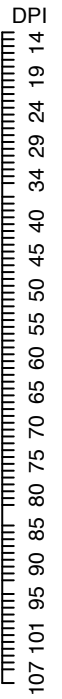

39. bf3419.SPOT12.clone3

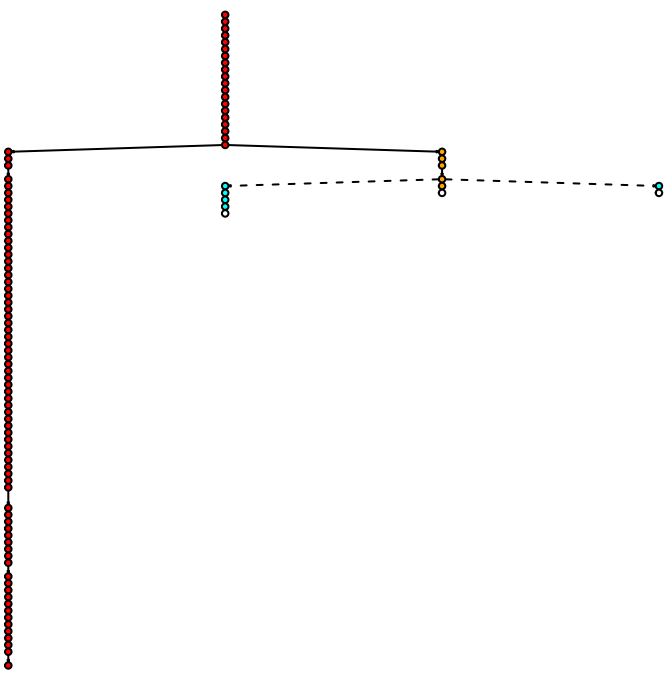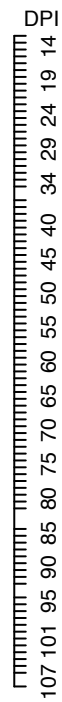

40. bf3419.SPOT14.clone1

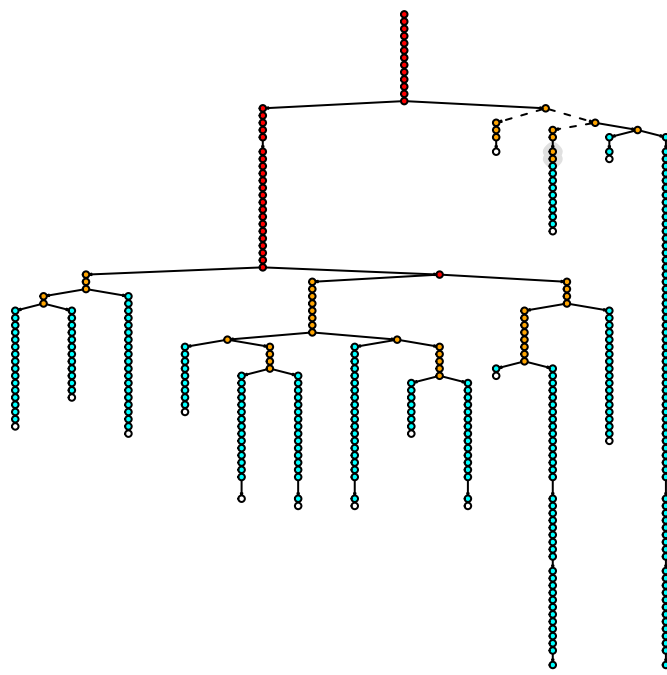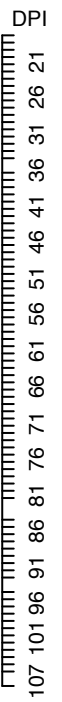

41. bf3419.SPOT6.clone1

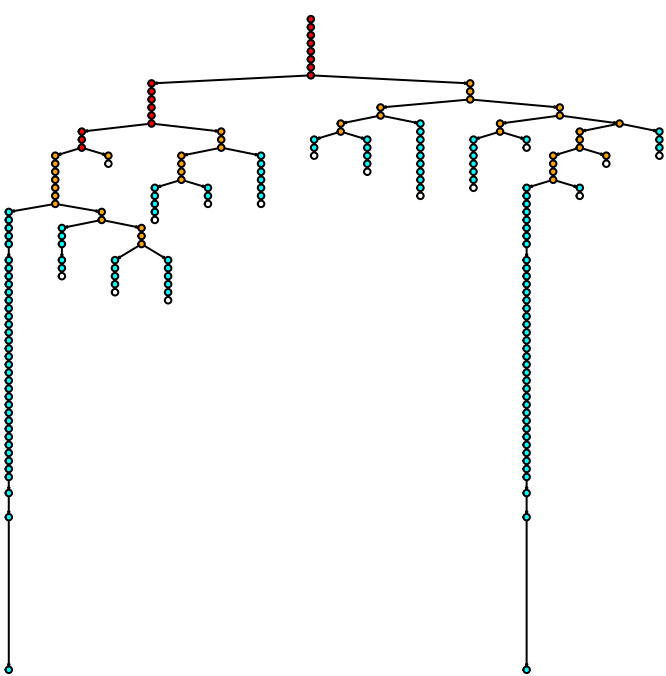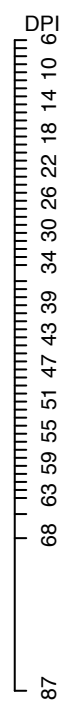

42. bf3419.SPOT6.clone2

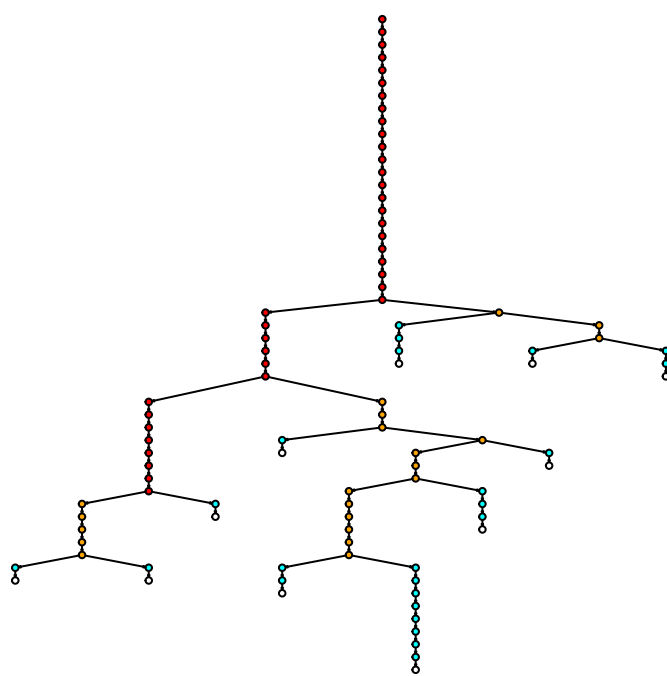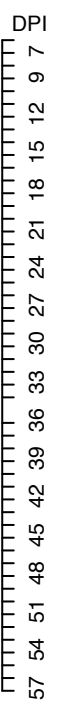

|              |                       |                     |
|--------------|-----------------------|---------------------|
| cell types   | uncertainty cell type | uncertainty lineage |
| ● R          | ○ semi-certain        | — certain           |
| ● NR         | ● uncertain           | - - - semi-certain  |
| ● N          |                       | ⋯ uncertain         |
| ○ Cell_Death |                       |                     |



43. bf3419.SPOT7.clone1

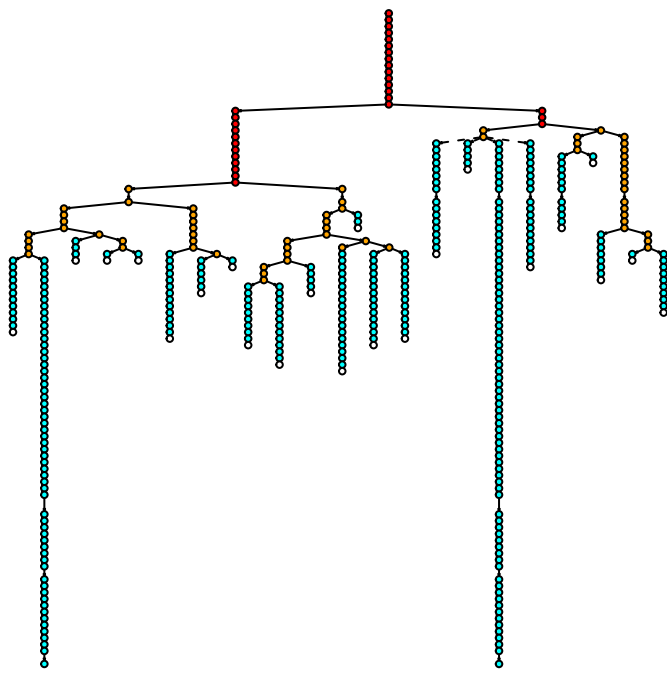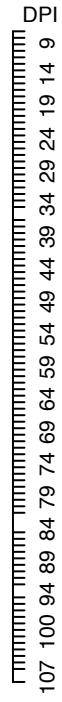

44. bf4845.SPOT3.clone1

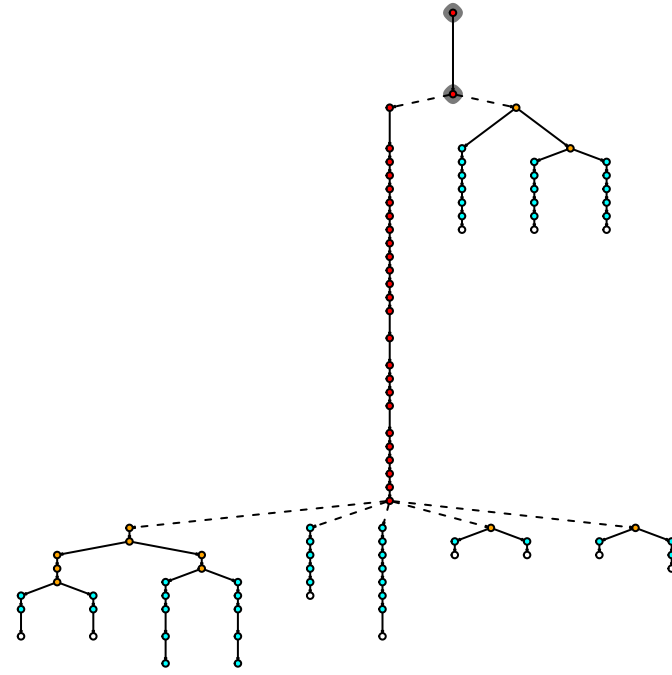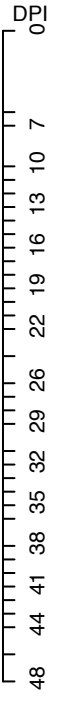

45. bf4845.SPOT4.clone1

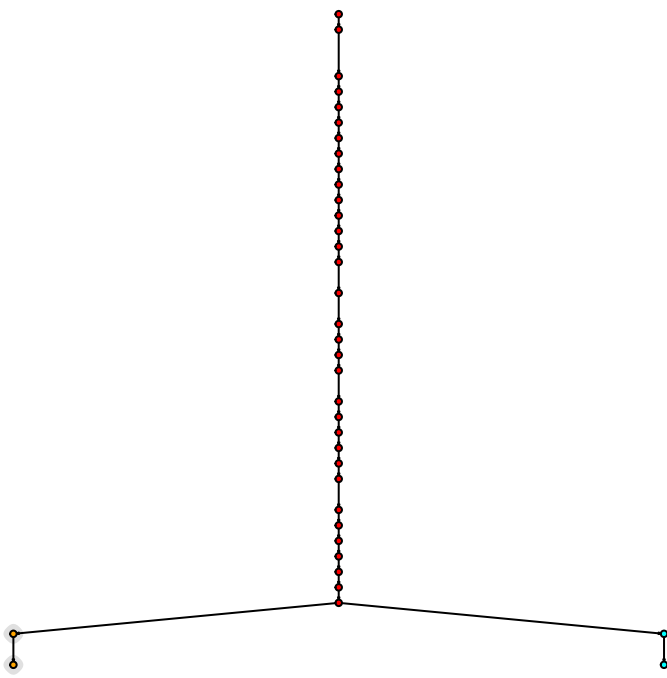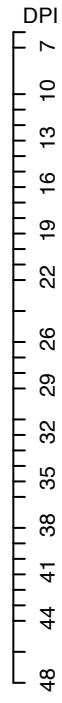

46. bf4845.SPOT4.clone2

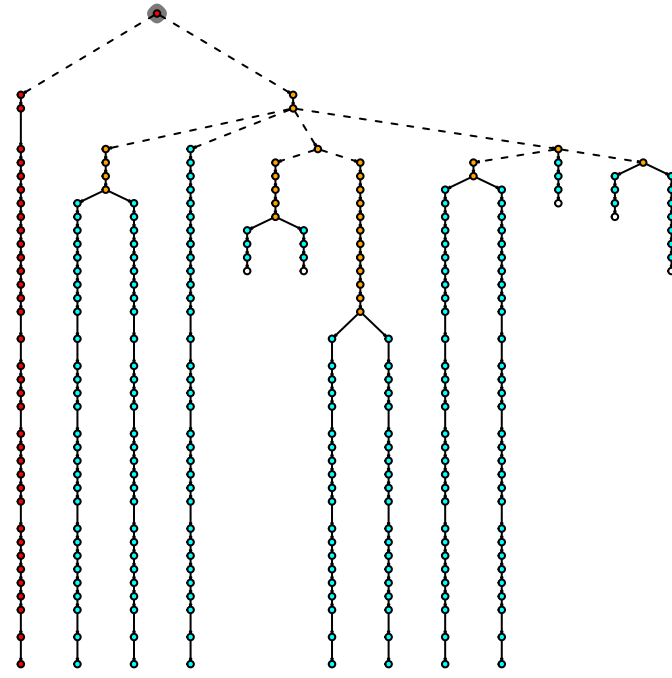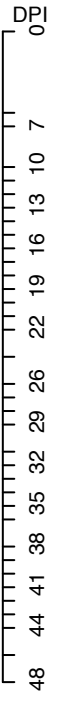

47. bf4845.SPOT4.clone3

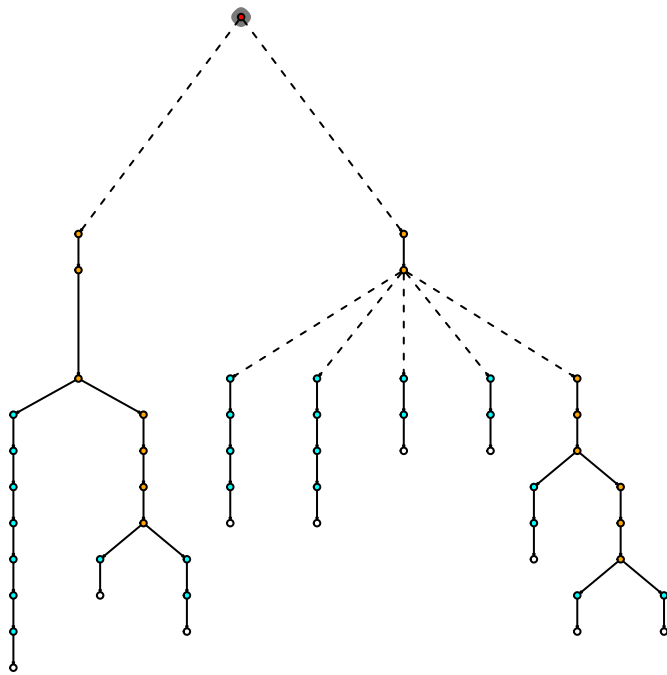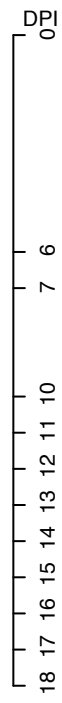

cell types    uncertainty cell type    uncertainty lineage

- R
- NR
- N
- Cell\_Death
- semi-certain
- uncertain
- certain
- - - semi-certain
- ⋯ uncertain
